# Supplementary material for: Initiation and spread of escape waves within animal groups
Source: PubMed Central journal article supplement (PMC4448869; doi:10.1098/rsos.140355), 2015-04-01

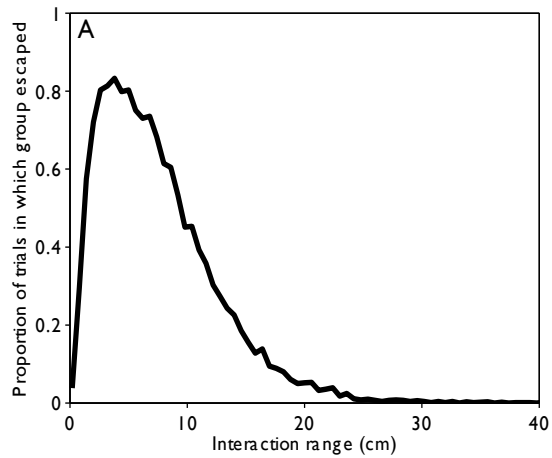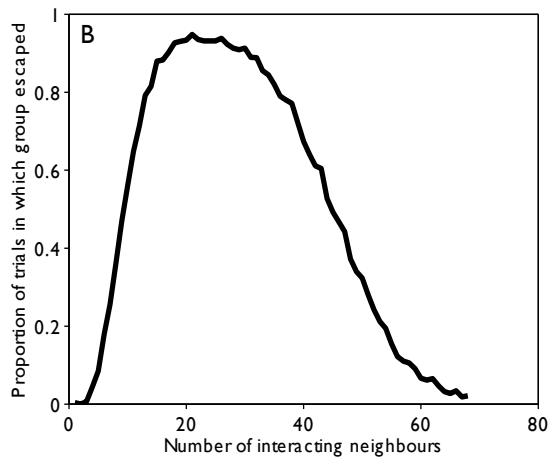

Supplement: rsos140355supp6.pdf [file rsos140355supp6.pdf]
