# Supplementary material for: Initiation and spread of escape waves within animal groups
Source: PubMed Central journal article supplement (PMC4448869; doi:10.1098/rsos.140355), 2015-04-01
Supplement: rsos140355supp11.pdf [file rsos140355supp11.pdf]

| Day   | Group size              |
|-------|-------------------------|
| 1     | 51, 137,                |
| 2     | 54, 24, 89, 50, 17      |
| 3     | 71, 115, 29, 15,        |
| 4     | 120                     |
| 5     | 10, 101, 83,            |
| 6     | 158                     |
| 7     | 38, 20, 126,            |
| 8     | 138, 54, 48             |
| 9     | 55, 63, 34, 45,         |
| 10    | 141, 58                 |
| 11    | 87, 31, 80, 53,         |
| 12    | 45, 23, 98, 47          |
| 13    | 64, 16, 134,            |
| 14    | 9*, 8*, 8*, 9*, 6*, 11* |
| 15-17 | Single fish experiments |
