# Supplementary material for: Initiation and spread of escape waves within animal groups
Source: PubMed Central journal article supplement (PMC4448869; doi:10.1098/rsos.140355), 2015-04-01
Supplement: rsos140355supp12.pdf [file rsos140355supp12.pdf]

1 **Supplementary material for: Initiation and spread of escape waves within**  
2 **animal groups** J.E. Herbert-Read, J. Buhl, F. Hu, A.J.W. Ward, D.J.T. Sumpter

3  
4  
5 **Additional Experimental Procedures.** Because we were needed to use large numbers of fish in  
6 the trials, and to comply with the reductionist policy of animal ethic protocols, we reused fish  
7 during the group experimental trials (but not the single fish experiments or control trials; see  
8 below). The same fish, however, were never used more than once per day. Further, we  
9 randomized group sizes across days (table S1). To test whether day had an effect on the  
10 behaviour of the fish, we fitted generalized linear models where day was included as a factorial  
11 variable to account for all possible variation in response. All non-significant interaction terms  
12 were removed. Whilst there was an effect of group size on the average speed of fish in the  
13 second before the stimulus entered the arena ( $F_{1,25} = 14.7, p < 0.001$ ), there was no effect of day  
14 ( $F_{12,25} = 1.59, p = 0.16$ ). Once again, there was an effect of group size on the speed of fish in the  
15 second after the stimulus entered the arena ( $F_{1,25} = 9.74, p = 0.005$ ) but no effect of day ( $F_{12,25} =$   
16  $0.96, p = 0.51$ ). Finally, there was no effect of group size or day on the speed of the escape wave  
17 ( $F_{1,14} = 0.13, p = 0.72; F_{12,14} = 0.94, p = 0.54$ , respectively).

18  
19 **Detecting the individual that responded to the stimulus first.** For each frame, we calculated  
20 the shortest Euclidian distance between the stimulus location and any fish. For each frame  
21 following the application of the stimulus, we also determined when a fish first started moving in  
22 the anticlockwise escape direction. If several fish reacted on the same frame, we considered the  
23 first reacting fish as the nearest one to the stimulus. We manually tracked the position of these  
24 first responders using a bespoke script made in MATLAB.

25 **Detecting the fast moving fish.** During the initial phase of the reaction to the stimulus, reacting  
26 fishes were usually seen accelerating to high speed. To quantify how many fish were involved in  
27 high-speed movement and what was their maximal speed, we calculated the distribution of fish  
28 speed before the stimulus (during the 30 frames immediately preceding the stimulus in all  
29 experiments,  $n = 34833$ ), and determined the speed of the 99 percentile ( $0.253 \text{ m s}^{-1}$ ), which  
30 represented 2.03 times the average fish speed ( $0.124 \text{ m s}^{-1} \pm 5.94$ ). We then considered a fast  
31 reacting fish as any fish that was moving anticlockwise and at a speed higher than 2 times the  
32 average initial fish speed (calculated during the first second of the experiment). We recorded the  
33 number of fast reacting fish on each frame after the reaction started (figure S4). The total number  
34 of fast reacting fish detected in each group size tested is also shown (figure S7).

35

36 **Determining whether the stimulus produced a localized response.** We found a strong  
37 relationship between the distance of the closest fish to stimulus and the distance from the  
38 stimulus to the first fish detected as reacting to the stimulus ( $r = 0.42$ ,  $n = 39$ ,  $p = 0.007$ )  
39 indicating that the first fish to switch from a clockwise (moving towards the stimulus) to an  
40 anticlockwise direction (moving away from the stimulus) was generally the closest fish to the  
41 stimulus. This supports a localised response to the stimulus. However, we also determined  
42 whether the stimulus created a localized response (and not a global response) that could not be  
43 detected by all group members using control trials. Using a different set of fish to the  
44 experimental trials, we ran control trials ( $n = 6$ ) where we released the stimulus when all fish  
45 were between 31.9 cm and 47.9 cm from the stimulus (shortest Euclidean distance; tangential arc  
46 length distance is shown in figure S8). We did not re-use fish in control trials. Fish in these

47 trials did not initiate a response to move away from the stimulus (figure S9). Nor did they show a  
48 characteristic increase in speed or alignment following the attack (figure S9).

49

50 **Effects of group size on speed.** There was a strong relationship between group size and the  
51 average speed of fish before the stimulus entered the arena ( $r = -0.46$ ,  $n = 39$ ,  $p = 0.004$ ); larger  
52 groups had slower average speeds than smaller groups (figure S10).

53

54 **Interaction range and topological interactions.** In order to investigate how the interaction  
55 range affected the escape wave, we first used the same parameters as above, but now varied  $r$ .  
56 The results of these simulations are shown in figure S6a. When  $r$  is equal to the width of the  
57 group, then the group typically adopts the direction given average direction of all individuals at  
58 start of the simulation. The average direction is given by

$$(-2.19p + (1 - p))v_{max}$$

59 which is positive for  $p = 0.1$ . Therefore, large interaction radii seldom result in direction changes  
60 in response to stimuli.

61

62 The metric interaction radii model can be replaced by a topological model where each the set of  
63 neighbours  $N_i(t)$  are the set of  $n$  nearest neighbours. Now,  $|N_i(t)| = n$  [52]. The probability the  
64 group changes direction as a function of  $n$  is shown in figure S6b. Again, interactions with a  
65 large number of individuals lead to adoption of the average direction of all group members and a  
66 failure to turn in response to the stimulus.

67

68

69 **Supporting References**

70 52. Ballerini, M., Cabibbo, N., Candelier, R., Cavagna, A., Cisbani, E., Giardina, I.,  
71 Lecomte, V., Orlandi, A., Parisi, G., Procaccini, A. et al. 2008 Interaction ruling animal  
72 collective behavior depends on topological rather than metric distance: Evidence from a  
73 field study. *Proc Nat Acad Sci* 105(4), 1232-1237.

74

75

76

77

78

79

80

81

82

83

84

85

86

87

88

89

90

91

92

93

94

95

96

97

98 **Figure S1.** Collective alignment and density of fish before and after presentation of the stimulus.  
99 (a) Collective alignment and (b) density of fish before (negative seconds) and after (positive  
100 seconds) the stimulus entered the arena. The shoals show an increase in alignment and density  
101 following the entrance of the stimulus at 0 seconds. The density of fish remains high due to fish  
102 gathering on the opposite side of the arena to the stimulus.

103

104 **Figure S2.** Examples of the dynamics of information transfer and spatial velocity fluctuations in  
105 the experimental trials. Trials with (a, e) 63 fish; (b, f) 45 fish; (c, g) 98, (d, h) 16. (a-d) Each  
106 line represents a one dimensional view of the arena at a given frame where each individual's  
107 angular coordinate (in a polar coordinate system with the centre of the arena as a pole and the  
108 radius going through the stimulus position as a polar axis) is represented by a colour coded point  
109 (the colour bar indicates values in radians) representing its angle relative to the radius  $\chi$ :  
110 individuals in deep blue colour are moving perpendicularly to the radius and moving in the  
111 clockwise direction, individuals in red colour are oriented perpendicular to the radius but moving  
112 anti-clockwise, and individuals in green colour are moving in a parallel direction to the radius.  
113 As the trial progresses in time (Y axis), the fish get closer to the stimulus until the stimulus  
114 enters the arena (yellow horizontal line). A clear escape response develops, with all individuals  
115 moving away from the stimulus. (e-h) Velocity fluctuations (see main text) measured as a  
116 function of distance during the trial. These are uncorrelated before attack, positively correlated at  
117 shorter distances and an anti-correlated at greater distances during the attack, but uncorrelated  
118 following the attack. The points at which the velocity fluctuations reach zero indicate the group's  
119 correlation length.

120

121 **Figure S3.** Speed profiles of individual fish reacting to the stimulus. The average speed of the  
122 first responding individual in groups (blue line) and when individuals were trialled on their own  
123 (red line) after the stimulus entered the arena at 0 seconds. Fish in both contexts show a rapid  
124 increase in speed following the attack, characteristic of fast-start responses in fish. Following the  
125 attack, they return to a swim speed similar to that of their swim speed before the stimulus. Error  
126 bars represent  $1 \pm SE$ .

127

128 **Figure S4.** Distribution of fish speeds before and after the presentation of the stimulus. (a) Mean  
129 speed of all fish in trials ( $\pm 1$  SD) before (negative seconds) and after (positive seconds) the  
130 stimulus enters the arena at 0 seconds. Between -4 to 0 seconds the fish reach an average cruise  
131 speed of  $0.124 \text{ m s}^{-1}$ . Following the introduction of the stimulus, there is a general decrease in  
132 speed due to the group gathering on the opposite side of the arena to the stimulus. (b) The  
133 proportion of fast moving individuals (those individuals travelling the speed of  $0.248 \text{ m s}^{-1}$ )  
134 peaks at approximately 1.5 seconds following the introduction of the stimulus at 0 seconds. (c-d)  
135 Histogram showing the distribution of speeds of individuals in the 2 seconds before (c) and after  
136 (d) the stimulus had entered the arena. The long tail in (d) shows the speeds and relative  
137 proportions of the faster moving informed individuals.

138

139

140

141

142 **Figure S5.** The role of speed change in determining whether a group changes direction. Results  
143 of 1024 simulation runs of 80 individuals, in which 8 are informed. The dotted line shows the  
144 proportion of runs in which the group changed direction as a function of group width when  
145 informed and uninformed individuals travel at the same speed (i.e.  $v_i(0) = -v_{max}$ ), while the  
146 solid line gives the same measure for uninformed individuals that initially travel faster than  
147 informed individuals (i.e. the standard value of  $v_i(0) = -2.19v_{max}$ ).  
148

149 **Figure S6.** How success depends on the locality of interactions. Proportion of the group that  
150 evaded the threat in model simulations where results are from 1024 simulation runs for each  
151 interaction range or number. We look at 120 particles, where 12 are initially informed. (a) Metric  
152 interactions: a particle's neighbours are all those within the interaction radius (b) Topological  
153 interactions: particles neighbours are the  $k$  nearest individuals. Note, these two interaction rules  
154 are largely equivalent if individuals regulate their density.  
155

156 **Figure S7.** The number of fast moving fishes (those individuals travelling at a speed of 0.248 m  
157  $s^{-1}$  in a counter clockwise direction) within the first second following the introduction of the  
158 stimulus in a trial, plotted against the group size for that trial.  
159

160 **Figure S8.** Examples of fish trajectories in the control trials. The movements of fish (as in  
161 figure S2 *a-d*) in control trials when the stimulus was released when the nearest fishes were  
162 between 31.9 cm and 47.9 cm from the stimulus. At these distances, fish did not initiate a  
163 response to move away from the stimulus (average proportion of fish moving away from the  
164 stimulus in the last second of experiment:  $0.068 \pm 0.11$ ).  
165

166 **Figure S9.** Collective alignment and speed of fish in the control trials. (a) The average  
167 alignment of fish in the control trials. Unlike the other trials, fish do not show an average change  
168 in alignment, characteristic of individuals detecting the stimulus. (b) Further, they do not show  
169 any obvious changes in speed following the attack (see figure S1a for comparison). The gradual  
170 decrease in speed as the trial progresses is due to the fish encountering the stimulus as the trial  
171 progresses. Because the stimulus remains projected across the water, the fish slow down due to  
172 its novelty in the arena.  
173

174 **Figure S10.** Average speed of fish as a function of group size. Average speed of fish calculated  
175 during one second before (green) and after (red) the presentation of the stimulus as a function of  
176 the number of fish (each data point corresponds to one experiment).  
177

178  
179 **Table S1.** Experimental schedule. Number of fish and order of experimental and control trials  
180 (denoted by \*).  
181

182 **Movie S1.** Example of one of the trials with 58 fish showing the experimental set-up. The  
183 stimulus enters the arena after 2 seconds causing the fish to turn around in an attempt to evade  
184 the stimulus.  
185
